# Supplementary material for: Association of Alternative Markers of Carbohydrate Metabolism (Fructosamine and 1,5-Anhydroglucitol) with Perioperative Characteristics and In-Hospital Complications of Coronary Artery Bypass Grafting in Patients with Type 2 Diabetes Mellitus, Prediabetes, and Normoglycemia
Source: MDPI journal article supplement (doi:10.3390/diagnostics13050969), 2023-03-03
Supplement: s1 [file s1]

Supplementary Table S1. Perioperative characteristics of patients in groups with composite endpoint-1 (significant perioperative complications + extended hospital stay after surgery) and without it.

| Signs                                                           | Group 1<br>With combined endpoint<br>n = 291 | Group 2<br>Without combined<br>endpoint<br>n = 92 | p      |
|-----------------------------------------------------------------|----------------------------------------------|---------------------------------------------------|--------|
| Anamnestic and clinical characteristics                         |                                              |                                                   |        |
| Men / women (n, %)                                              | 205/86 (70.5/29.5)                           | 79/13(85.5/14.1)                                  | 0.003  |
| Age (years, Me [ LQ ; UQ ])                                     | 60.0 [55.0; 60.0]                            | 57.0 [51.0; 60.5]                                 | <0.001 |
| Any disorders of CMD (n, %)                                     | 156 (53.6)                                   | 36 (39.1)                                         | 0.015  |
| Type 2 diabetes (n, %)                                          | 109 (37.5)                                   | 16 (17.4)                                         | <0.001 |
| Prediabetes (IFG, IGT) (n, %)                                   | 47 (16.2)                                    | 20 (21.7)                                         | 0.002  |
| Normoglycemia (n, %)                                            | 135 (46.4)                                   | 56 (60.9)                                         | 0.002  |
| BMI ( kg/m <sup>2</sup> , Me [LQ; UQ])                          | 29.1 [25.9; 32.2]                            | 27.0 [24.1; 30.0]                                 | <0.001 |
| Obesity (BMI ≥30 kg / m <sup>2</sup> , n, %)                    | 125 (42.9)                                   | 24 (26.1)                                         | <0.001 |
| Arterial hypertension (n, %)                                    | 264 (90.7)                                   | 79 (85.9)                                         | 0.185  |
| Angina class III - IV (n, %)                                    | 113 (38.8)                                   | 34 (37.0)                                         | 0.591  |
| Heart failure class NYHA III-IV (n, %)                          | 84 (28.9)                                    | 18 (19.6)                                         | 0.172  |
| Smoking (n, %)                                                  | 86 (29.6)                                    | 42 (45.7)                                         | 0.004  |
| Myocardial infarction history (n, %)                            | 182 (62.5)                                   | 58 (63.0)                                         | 0.668  |
| Stroke history (n, %)                                           | 21 (7.2)                                     | 6 (6.5)                                           | 0.820  |
| Previous PCI (n, %)                                             | 26 (8.9)                                     | 11 (12.0)                                         | 0.392  |
| Previous CABG (n, %)                                            | 82 (0.7)                                     | 2 (2.2)                                           | 0.797  |
| Carotid surgery (n, %)                                          | 8 (2.8)                                      | 3 (3.3)                                           | 0.803  |
| Limb arteries surgery or amputation (n, %)                      | 2 (0.7)                                      | 1 (1.1)                                           | 0.704  |
| EuroSCORE II (% , Me [LQ; UQ])                                  | 1.34 [1.23; 2.91]                            | 1.32 [0.88; 2.10]                                 | 0.002  |
| EuroSCORE II (points, Me [LQ; UQ])                              | 2.0 [1.0; 3.0]                               | 2.0 [1.0; 3.0]                                    | <0.001 |
| CABG characteristics                                            |                                              |                                                   |        |
| Cardiopulmonary bypass (n, %)                                   | 268 (92.1)                                   | 78 (84.8)                                         | 0.038  |
| Isolated coronary artery bypass grafting (n, %)                 | 263 (90.4)                                   | 91 (98.9)                                         | 0.007  |
| Combined surgery (n, %)                                         | 28 (9.6)                                     | 1 (1.1)                                           | 0.007  |
| • Carotid endarterectomy (n, %)                                 | 8 (8.2)                                      | 0 (0)                                             | 0.108  |
| • Ventriculoplasty (n, %)                                       | 13 (4.5)                                     | 1 (1.1)                                           | 0.132  |
| • Radiofrequency ablation (n, %)                                | 14 (4.8)                                     | 0 (0)                                             | 0.032  |
| • Mitral valve (n, %)                                           | 1 (0.3)                                      | 0 (0)                                             | 0.573  |
| • Aortic valve (n, %)                                           | 3 (1.0)                                      | 0 (0)                                             | 0.328  |
| Cardiopulmonary bypass duration (minutes, Me [LQ; UQ])          | 98.0 [81.0; 116.0]                           | 86.5 [73.0; 103.0]                                | 0.002  |
| Aortic clamping time (minutes, Me [ LQ; UQ ])                   | 63.0 [50.0; 75.0]                            | 60.0 [49.0; 72.0]                                 | 0.331  |
| Total duration of surgery (minutes, Me [ LQ; UQ ])              | 246 [210.0; 298.0]                           | 210.0 [195.0; 264.0]                              | 0.006  |
| Number of shunts (Me [ LQ ; UQ ])                               | 3.0 [2.0; 3.0]                               | 2.0 [2.0; 3.0]                                    | 0.352  |
| Number of distal anastomoses (Me [ LQ; UQ ])                    | 3.0 [2.0; 3.0]                               | 2.0 [2.0; 3.0]                                    | <0.001 |
| Preoperative fasting blood laboratory parameters (Me [LQ; UQ]). |                                              |                                                   |        |
| GFR CKD-EPI (ml/min/1.73m <sup>2</sup> )                        | 80.4 [64.0; 98.6]                            | 81.4[63.2; 98.6]                                  | 0.906  |
| HDL cholesterol (mmol/l )                                       | 1.0 [0.8; 1.2]                               | 1.0 [0.8; 1.2]                                    | 0.286  |

|                                                   |                         |                         |        |
|---------------------------------------------------|-------------------------|-------------------------|--------|
| LDL cholesterol (mmol/l )                         | 2.9 [2.2; 3.7]          | 3.0 [2.3; 3.9]          | 0.304  |
| Triglycerides (mmol/l )                           | 2.0 [1.4; 2.5]          | 1.6 [1.2; 2.2]          | 0.046  |
| HbA1c (%)                                         | 5.5 [5.1; 7.1]          | 5.3 [5.0; 5.6]          | 0.009  |
| Glucose, venous plasma (mmol/l )                  | 5.8 [5.2; 6.9]          | 5.5 [5.1; 6.2]          | 0.031  |
| Fructosamine (μmol/l)                             | 286.0 [252.0; 320.0]    | 264.5 [201.0; 298.0]    | <0.001 |
| 1.5 anhydroglucitol (mcg/ml)                      | 21,3 [16,5; 25.2]       | 20.5 [17.8; 26.0]       | 0,483  |
| Preoperative echocardiogram (Me [LQ; UQ])         |                         |                         |        |
| LV end-diastolic volume (ml)                      | 156.0<br>[132.0; 191.0] | 150.0<br>[129.0; 172.0] | 0.125  |
| LV end-diastolic dimension (cm)                   | 5.6 [5.2; 6.2]          | 5.5 [5.1; 6.0]          | 0.051  |
| LV end-systolic volume (ml)                       | 63.0 [47.0; 97.0]       | 62.2 [48.0; 96.5]       | 0.421  |
| LV end-systolic dimension (cm)                    | 3.8 [3.4; 4.7]          | 3.8 [3.3; 4.6]          | 0.467  |
| Left atrium (cm)                                  | 4.3 [4.0; 4.5]          | 4.2 [3.8; 4.4]          | <0.001 |
| LV ejection fraction (%)                          | 60.0 [50.0;64.0]        | 61.0 [50.0; 64.0]       | 0.958  |
| LV myocardial mass<br>by Devereux and Reichek (g) | 304.3 [250.5; 375.0]    | 242.1 [276.0; 333.7]    | 0.010  |
| LV myocardial mass index (g/m <sup>2</sup> )      | 159.2 [133.5; 192.0]    | 150.3 [124.2; 175.0]    | 0.015  |
| Coronary angiography data                         |                         |                         |        |
| 1-vessel disease *                                | 64 (22.0)               | 16 (17.4)               | 0.343  |
| 2-vessel disease *                                | 88 (30.2)               | 25 (27.2)               | 0.274  |
| 3-vessel disease *                                | 121 (41.6)              | 45 (48.9)               | 0.216  |
| Left Main Coronary Artery Stenosis >50%           | 61 (21.0)               | 24 (26.1)               | 0.302  |

**Notes:** Me [LQ; UQ] - median with upper and lower quartile, CMD - carbohydrate metabolism disorders, IFG - impaired fasting glucose, IGT - impaired glucose tolerance, BMI - body mass index, FC - functional class, NYHA - New York Heart Association, PCI - percutaneous coronary intervention, LOS - length of stay, CABG - coronary artery bypass grafting, EuroSCORE II – European System for Cardiac Operative Risk Evaluation, CMD - carbohydrate metabolism disorders, HDL - high-density lipoprotein, LDL - low-density lipoprotein, GFR - glomerular filtration rate, CKD-EPI - Chronic Kidney Disease Epidemiology Collaboration, LV- left ventricle.

Supplementary Table S2: Receiver operating characteristic curve analysis. Performance of carbohydrate metabolism preoperative parameters in discriminating the risk of the composite endpoint-1 development (significant perioperative complications + extended hospital stay after surgery) after CABG. Area under the curve

| Test Result Variable(s)              | Area  | Std. Error <sup>a</sup> | Asymptotic<br>Sig. <sup>b</sup> | Asymptotic 95%<br>Confidence Interval |             |
|--------------------------------------|-------|-------------------------|---------------------------------|---------------------------------------|-------------|
|                                      |       |                         |                                 | Lower Bound                           | Upper Bound |
| Fructosamine before surgery          | 0.629 | 0.035                   | 0.001                           | 0.560                                 | 0.698       |
| Glucose before surgery               | 0.563 | 0.037                   | 0.093                           | 0.490                                 | 0.635       |
| Disorders of carbohydrate metabolism | 0.534 | 0.036                   | 0.366                           | 0.463                                 | 0.604       |
| Diabetes mellitus                    | 0.586 | 0.035                   | 0.021                           | 0.518                                 | 0.654       |
| Impaired fasting glycemia            | 0.498 | 0.037                   | 0.959                           | 0.425                                 | 0.571       |

a. Under the nonparametric assumption

b. Null hypothesis: true area = 0.5
